# Supplementary material for: A behavioral paradigm for measuring perceptual distances in mice
Source: PubMed Central journal article supplement — Cell Rep Methods. 2022 Jun 9;2(6):100233. doi: 10.1016/j.crmeth.2022.100233 (PMC9243525; doi:10.1016/j.crmeth.2022.100233), 2022-06-09
Supplement: mmc1.pdf [file mmc1.pdf]

**Cell Reports Methods, Volume 2**

**Supplemental information**

**A behavioral paradigm for measuring  
perceptual distances in mice**

**Hirofumi Nakayama, Richard C. Gerkin, and Dmitry Rinberg**

## A behavioral paradigm for measuring perceptual distances in mice

Hirofumi Nakayama, Richard C. Gerkin, Dmitry Rinberg

### Supplemental Information

**Table S1. Odors used in the experiments, Related to Figures 1, 2, and 3**

| Set | Odor name                   | Abbreviation | Liquid dilution | Headspace concentration (M)* | Air dilution range |
|-----|-----------------------------|--------------|-----------------|------------------------------|--------------------|
| 1   | Cinnamaldehyde              | CinAld       | 0.0004          | $8.9 \times 10^{-10}$        | 0.01 – 0.05        |
|     | Ethyl butyrate              | EB           | 0.0008          | $9.1 \times 10^{-7}$         |                    |
|     | 2-Methylbutyric acid        | 2MBAcd       | 0.0004          | $8.9 \times 10^{-9}$         |                    |
|     | 2,2-Dimethylbutyric acid    | 22DMBAcd     | 0.0004          | $2.3 \times 10^{-9}$         |                    |
|     | Cyclopentanecarboxylic acid | CPAcd        | 0.0012          | $1.1 \times 10^{-8}$         |                    |
|     | 2-Heptanone                 | 2Hep         | 0.0002          | $4.2 \times 10^{-8}$         |                    |
|     | Isobutyric acid             | IBAcd        | 0.0004          | $7.6 \times 10^{-8}$         |                    |
|     | Isovaleric acid             | IVAcd        | 0.0004          | $1.6 \times 10^{-8}$         |                    |
| 2   | 3-Heptanone                 | 3Hep         | 0.001           | $1.8 \times 10^{-7}$         | 0.02 – 0.1         |
|     | Methylvalerate              | MVT          | 0.0002          | $1.6 \times 10^{-7}$         |                    |
|     | Ethyl butyrate              | EB           | 0.0018          | $2.0 \times 10^{-6}$         |                    |
|     | Propionic acid              | PpAcd        | 0.0063          | $2.0 \times 10^{-7}$         |                    |
|     | Butyric acid                | ButAcd       | 0.001           | $4.5 \times 10^{-8}$         |                    |
|     | (+)- $\alpha$ -Pinene       | Pinene       | 0.001           | $2.9 \times 10^{-7}$         |                    |
|     | Benzaldehyde                | BzAld        | 0.0004          | $4.9 \times 10^{-8}$         |                    |
|     | 5-Methyl-2-Hexanone         | 5M2H         | 0.0002          | $6.9 \times 10^{-8}$         |                    |
| 3   | 3-Heptanone                 | 3Hep         | 0.001           | $1.8 \times 10^{-7}$         | 0.01 – 0.05        |
|     | Ethyl butyrate              | EB           | 0.0018          | $2.0 \times 10^{-6}$         |                    |
|     | Valeric acid                | ValAcd       | 0.0002          | $3.5 \times 10^{-9}$         |                    |
|     | 3-Methylvaleric acid        | 3MVAcd       | 0.0002          | $2.3 \times 10^{-9}$         |                    |
|     | 3,3-Dimethylbutyric acid    | 33DMBAcd     | 0.0002          | $4.6 \times 10^{-9}$         |                    |
|     | (+)- $\alpha$ -Pinene       | Pinene       | 0.001           | $2.9 \times 10^{-7}$         |                    |
|     | Benzaldehyde                | BzAld        | 0.0004          | $4.9 \times 10^{-8}$         |                    |
|     | Isovaleric acid             | IVAcd        | 0.0002          | $7.8 \times 10^{-9}$         |                    |
|     | 4-Methylvaleric acid        | 4MVAcd       | 0.0002          | $2.1 \times 10^{-9}$         |                    |
|     | Hexanoic acid               | HexAcd       | 0.0002          | $2.8 \times 10^{-9}$         |                    |

\* - Headspace concentration was approximately estimated based on dilution and saturated vapor pressure of a chemical

**Table S2. Trial statistics of different odor sets, Related to Figures 1, 2, and 3**

| Set | # of mice | # of trials | # of sessions | Trial # / session<br>(mean $\pm$ std) |
|-----|-----------|-------------|---------------|---------------------------------------|
| 1   | 10        | 75195       | 308           | 244.1 $\pm$ 73.2                      |
| 2   | 6         | 24295       | 107           | 227.1 $\pm$ 75.0                      |
| 3   | 12        | 58232       | 259           | 224.8 $\pm$ 80.3                      |

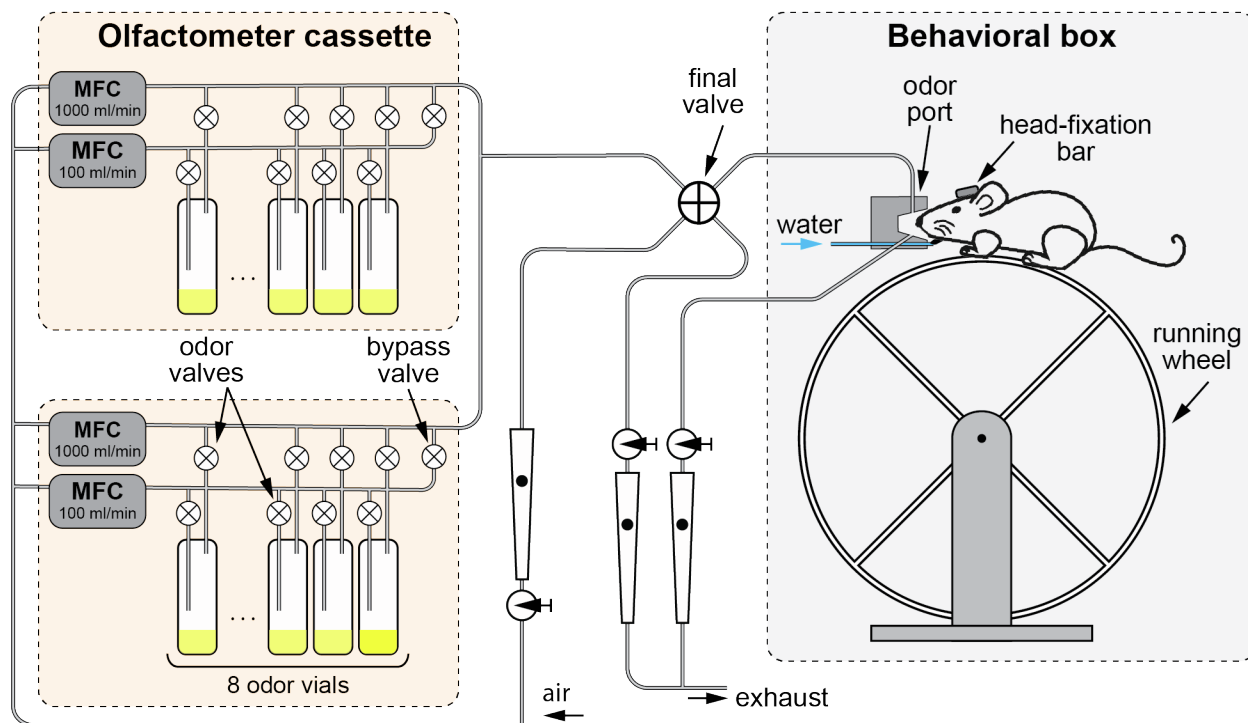

**Figure S1. Experimental setup, Related to Method Details session.** *Left:* the odor delivery system. Odors are delivered using a two-cassette air dilution olfactometer. Each cassette has 8 odor vials and two Mass Flow Controllers (MFCs) for flow ranges of 0-1000 ml/min and 0-100 ml/min. To prepare an odor, a pair of valves for a single odor vial is opened and an odorized air flow (1000 ml/min) is first directed to the exhaust via the final valve. Clean air of the same flow is delivered to the odor port. After approximately 1 sec of the flow stabilization, the final valve redirects the odorized flow to the odor port and the clean air to the exhaust. The concentration is controlled by the ratio of the MFC flow rates. To deliver a binary mixture, two vials from different cassettes are opened simultaneously. The air is continuously pumped away from the odor port with the same air flow rate. *Right:* behavioral setup. A mouse is positioned on a freely rotating running wheel with its head fixed. The mouse snout is placed in the odor port. The water delivery spouts are positioned below the odor port opening.

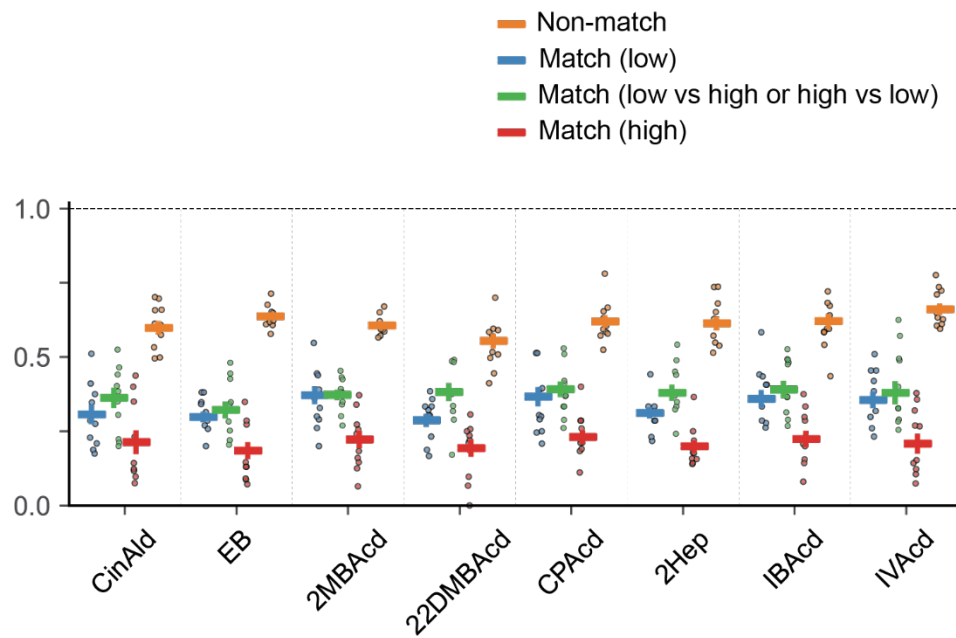

**Figure S2. Probability of a no-go choice by odor identity and concentrations, Related to Figure 1.** Trials were assigned to a specific odor identity if that odor was presented either on first or second presentations. Circles correspond to individual mice, and bars are averages across mice (n = 10 mice, 75195 trials, odor set #1 (Table S1)).

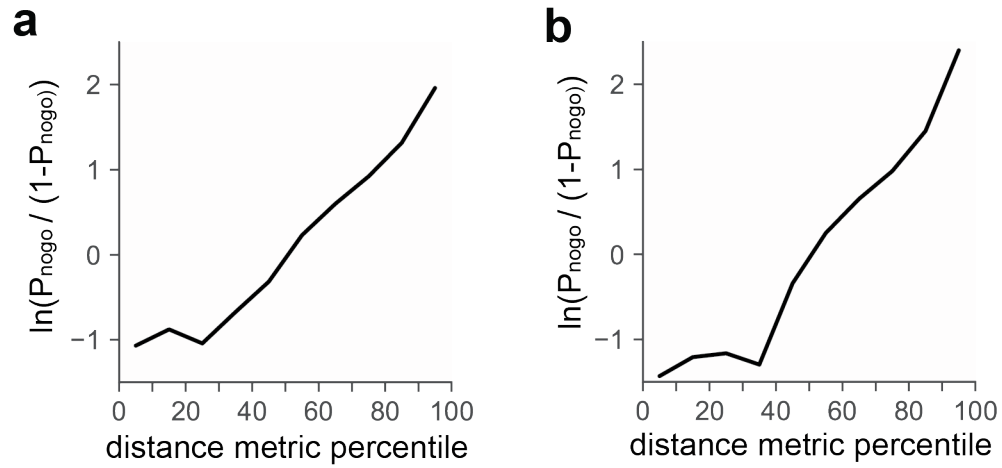

**Figure S3. Relationship between distance metric and logit of probability of nogo choice, Related to Figure 3.** **a.** plot showing the dependence of  $\text{logit}(P_{nogo})$  (left-hand side of (Eq. 2)) on the distance metric between odor pairs. The x-axis represents percentile of distance metric across all odor pairs. **b.** same as in **a** for (Eq.3).

$$\mathbf{a}: D(A, B) = 1 - \frac{1 - P_{nogo}(A, B)}{\sqrt{(1 - P_{nogo}(A, A))(1 - P_{nogo}(B, B))}}$$

$$\mathbf{b}: D(A, B) = P_{nogo}(A, B)$$

$$\mathbf{c}: D(A, B) = \max(P_{nogo}(A, B) - P_{nogo}(A, A), P_{nogo}(A, B) - P_{nogo}(B, B))$$

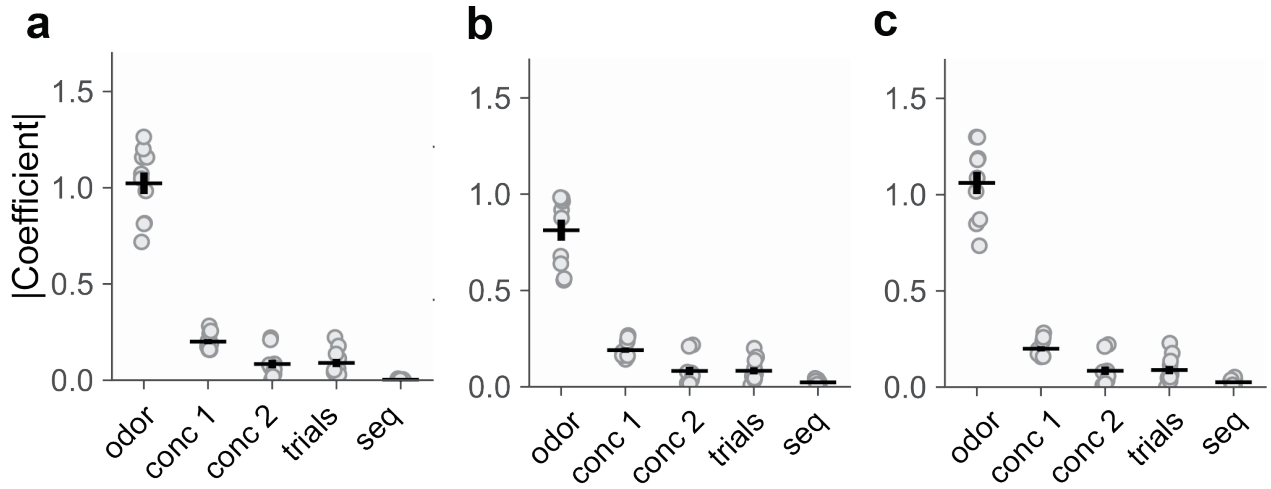

**Figure S4. Comparison of regression analysis for different distance metrics, Related to Figure 3 a,b.** Absolute value of regression coefficients in the logistic regression model (Eq.2) for odor identity (odor), concentration of the first (conc 1) and the second (conc 2) presented odors, earlier vs later trials in a session (trials), and sequence of odor presentation A->B vs B->A (seq) (n = 10 mice, 75195 trials) for **a**, original distance metric Eq.1 (the same as Fig. 3a); **b**, for distance metric;  $D(A, B) = P_{nogo}(A, B)$ ; **c**, for distance metric  $D(A, B) = \max(P_{nogo}(A, B) - P_{nogo}(A, A), P_{nogo}(A, B) - P_{nogo}(B, B))$
